# Supplementary material for: Usual physical activity and subsequent hospital usage over 20 years in a general population: the EPIC-Norfolk cohort
Source: PubMed Central journal article supplement (PMC7204050; doi:10.1186/s12877-020-01573-0), 2020-05-06

## Supplementary files

Filename: Supplementary\_Tables\_BMCGeriatrics\_20200430.pdf

Supplementary Table S1 | Multivariable logistic regression of risk factors for any hospital admissions,  $\geq 7$  hospital admissions and  $>20$  days of hospital stay from 1999 to 2019 in 25 014 men and women

Supplementary Table S2 | Adjusted mean hospital days by physical activity category for two periods, mean difference in days and cumulative cost, 1999–2009 using baseline physical activity and 2009–2019 using physical activity at TP2

Supplementary Figure | Flow diagram showing numbers of participants at various stages in the EPIC-Norfolk study including invitations, consents, attendance at health examinations and questionnaire completion.

**Supplementary Table S1 | Multivariable logistic regression of risk factors for any hospital admissions, ≥7 hospital admissions and >20 days of hospital stay from 1999 to 2019 in 25 014 men and women**

|                                                     | All subjects<br>OR (95% CI) | p value | Men<br>OR (95% CI) | p value | Women<br>OR (95% CI) | p value |
|-----------------------------------------------------|-----------------------------|---------|--------------------|---------|----------------------|---------|
| <b>Outcome of any hospital admissions</b>           |                             |         |                    |         |                      |         |
| Male sex                                            | 1.13 (1.03-1.23)            | 0.007   |                    |         |                      |         |
| Age per 10 years                                    | 2.07 (1.96-2.19)            | < 0.001 | 2.15 (1.98-2.33)   | < 0.001 | 2.01 (1.87-2.17)     | < 0.001 |
| Inactive                                            | 0.91 (0.82-1.01)            | 0.073   | 0.91 (0.78-1.07)   | 0.243   | 0.91 (0.80-1.05)     | 0.187   |
| Manual social class                                 | 1.15 (1.05-1.26)            | 0.003   | 1.19 (1.03-1.38)   | 0.016   | 1.12 (0.99-1.27)     | 0.077   |
| Lower education level                               | 1.42 (1.27-1.58)            | < 0.001 | 1.23 (1.04-1.47)   | 0.016   | 1.54 (1.35-1.77)     | < 0.001 |
| Current smoker                                      | 1.18 (1.03-1.35)            | 0.019   | 1.14 (0.93-1.40)   | 0.207   | 1.20 (1.01-1.45)     | 0.046   |
| BMI>30 kg/m <sup>2</sup>                            | 1.30 (1.14-1.49)            | < 0.001 | 1.19 (0.97-1.47)   | 0.108   | 1.38 (1.16-1.64)     | < 0.001 |
| <b>Outcome of seven or more hospital admissions</b> |                             |         |                    |         |                      |         |
| Male sex                                            | 1.21 (1.15-1.28)            | < 0.001 |                    |         |                      |         |
| Age per 10 years                                    | 1.45 (1.40-1.49)            | < 0.001 | 1.45 (1.38-1.51)   | < 0.001 | 1.45 (1.39-1.51)     | < 0.001 |
| Inactive                                            | 1.04 (0.98-1.10)            | 0.197   | 1.02 (0.93-1.11)   | 0.735   | 1.06 (0.98-1.15)     | 0.145   |
| Manual social class                                 | 1.16 (1.09-1.23)            | < 0.001 | 1.16 (1.06-1.26)   | < 0.001 | 1.16 (1.07-1.25)     | < 0.001 |
| Lower education level                               | 1.14 (1.07-1.21)            | < 0.001 | 1.13 (1.03-1.23)   | 0.011   | 1.15 (1.06-1.24)     | < 0.001 |
| Current smoker                                      | 1.33 (1.23-1.45)            | < 0.001 | 1.25 (1.11-1.41)   | < 0.001 | 1.41 (1.26-1.58)     | < 0.001 |
| BMI>30 kg/m <sup>2</sup>                            | 1.38 (1.28-1.48)            | < 0.001 | 1.38 (1.23-1.54)   | < 0.001 | 1.38 (1.25-1.52)     | < 0.001 |
| <b>Outcome of more than 20 hospital days</b>        |                             |         |                    |         |                      |         |
| Male sex                                            | 1.14 (1.08-1.21)            | < 0.001 |                    |         |                      |         |
| Age per 10 years                                    | 2.60 (2.52-2.70)            | < 0.001 | 2.53 (2.41-2.66)   | < 0.001 | 2.67 (2.54-2.80)     | < 0.001 |
| Inactive                                            | 1.12 (1.05-1.19)            | < 0.001 | 1.08 (0.99-1.19)   | 0.084   | 1.14 (1.05-1.25)     | 0.002   |
| Manual social class                                 | 1.18 (1.11-1.26)            | < 0.001 | 1.20 (1.10-1.31)   | < 0.001 | 1.17 (1.07-1.27)     | < 0.001 |
| Lower education level                               | 1.16 (1.09-1.23)            | < 0.001 | 1.18 (1.07-1.30)   | < 0.001 | 1.14 (1.05-1.24)     | 0.002   |
| Current smoker                                      | 1.55 (1.42-1.69)            | < 0.001 | 1.53 (1.35-1.74)   | < 0.001 | 1.56 (1.38-1.76)     | < 0.001 |
| BMI>30 kg/m <sup>2</sup>                            | 1.58 (1.46-1.71)            | < 0.001 | 1.54 (1.37-1.74)   | < 0.001 | 1.61 (1.45-1.78)     | < 0.001 |
| <b>Outcome of 12 or more hospital admissions</b>    |                             |         |                    |         |                      |         |
| Male sex                                            | 1.31 (1.22-1.41)            | < 0.001 |                    |         |                      |         |
| Age per 10 years                                    | 1.26 (1.21-1.31)            | < 0.001 | 1.31 (1.24-1.38)   | < 0.001 | 1.22 (1.15-1.29)     | < 0.001 |
| Inactive                                            | 1.06 (0.98-1.15)            | 0.124   | 1.07 (0.96-1.20)   | 0.193   | 1.05 (0.94-1.17)     | 0.352   |
| Manual social class                                 | 1.20 (1.12-1.29)            | < 0.001 | 1.19 (1.07-1.32)   | 0.001   | 1.22 (1.10-1.35)     | < 0.001 |
| Lower education level                               | 1.06 (0.98-1.15)            | 0.119   | 1.00 (0.90-1.12)   | 0.934   | 1.12 (1.01-1.25)     | 0.035   |
| Current smoker                                      | 1.42 (1.28-1.57)            | < 0.001 | 1.28 (1.10-1.48)   | 0.001   | 1.58 (1.37-1.82)     | < 0.001 |
| BMI>30 kg/m <sup>2</sup>                            | 1.33 (1.21-1.45)            | < 0.001 | 1.38 (1.21-1.58)   | < 0.001 | 1.28 (1.13-1.45)     | < 0.001 |
| <b>Outcome of more than 50 hospital days</b>        |                             |         |                    |         |                      |         |
| Male sex                                            | 1.02 (0.95-1.09)            | 0.647   |                    |         |                      |         |
| Age per 10 years                                    | 2.41 (2.32-2.51)            | < 0.001 | 2.22 (2.10-2.36)   | < 0.001 | 2.58 (2.44-2.74)     | < 0.001 |
| Inactive                                            | 1.12 (1.04-1.20)            | 0.002   | 1.03 (0.93-1.15)   | 0.558   | 1.19 (1.08-1.31)     | < 0.001 |
| Manual social class                                 | 1.17 (1.09-1.26)            | < 0.001 | 1.21 (1.09-1.34)   | < 0.001 | 1.14 (1.04-1.26)     | 0.007   |
| Lower education level                               | 1.15 (1.07-1.24)            | < 0.001 | 1.16 (1.04-1.30)   | 0.006   | 1.14 (1.03-1.25)     | 0.011   |
| Current smoker                                      | 1.56 (1.41-1.73)            | < 0.001 | 1.51 (1.30-1.74)   | < 0.001 | 1.61 (1.40-1.85)     | < 0.001 |
| BMI>30 kg/m <sup>2</sup>                            | 1.48 (1.35-1.61)            | < 0.001 | 1.46 (1.27-1.66)   | < 0.001 | 1.50 (1.33-1.68)     | < 0.001 |

**Supplementary Table S2 | Adjusted † mean hospital days by physical activity category for two periods, mean difference in days and cumulative cost, 1999–2009 using baseline physical activity and 2009–2019 using physical activity at TP2**

|                  | Cohort survivors | Hospital Days inactive | Hospital Days any-activity | Difference in hospital days | Mean difference over period | Cumulative cost £ |
|------------------|------------------|------------------------|----------------------------|-----------------------------|-----------------------------|-------------------|
| <b>1999-2009</b> |                  |                        |                            |                             |                             |                   |
| 1999             | 24 785           | 2.34                   | 1.58                       | 0.74                        | 0.42                        | 248               |
| 2000             | 24 528           | 1.78                   | 1.46                       | 0.34                        | 0.42                        | 495               |
| 2001             | 24 237           | 1.76                   | 1.56                       | 0.20                        | 0.42                        | 743               |
| 2002             | 23 916           | 2.16                   | 1.68                       | 0.48                        | 0.42                        | 991               |
| 2003             | 23 575           | 2.06                   | 1.58                       | 0.46                        | 0.42                        | 1239              |
| 2004             | 23 221           | 2.10                   | 1.58                       | 0.52                        | 0.42                        | 1486              |
| 2005             | 22 864           | 2.10                   | 1.72                       | 0.36                        | 0.42                        | 1734              |
| 2006             | 22 456           | 2.18                   | 1.72                       | 0.46                        | 0.42                        | 1982              |
| 2007             | 22 003           | 2.00                   | 1.64                       | 0.34                        | 0.42                        | 2230              |
| 2008             | 21 557           | 2.02                   | 1.70                       | 0.32                        | 0.42                        | 2477              |
| <b>2009-2019</b> |                  |                        |                            |                             |                             |                   |
| 2009             | 9642             | 1.58                   | 0.94                       | 0.62                        | 0.46                        | 2746              |
| 2010             | 9533             | 1.52                   | 1.16                       | 0.38                        | 0.46                        | 3015              |
| 2011             | 9389             | 2.08                   | 1.28                       | 0.78                        | 0.46                        | 3283              |
| 2012             | 9222             | 2.16                   | 1.76                       | 0.42                        | 0.46                        | 3552              |
| 2013             | 9023             | 2.54                   | 2.18                       | 0.38                        | 0.46                        | 3821              |
| 2014             | 8859             | 2.24                   | 1.96                       | 0.28                        | 0.46                        | 4089              |
| 2015             | 8619             | 2.34                   | 1.52                       | 0.82                        | 0.46                        | 4358              |
| 2016             | 8362             | 2.12                   | 1.46                       | 0.66                        | 0.46                        | 4627              |
| 2017             | 8101             | 2.06                   | 1.98                       | 0.08                        | 0.46                        | 4895              |
| 2018             | 7948             | 1.68                   | 1.52                       | 0.18                        | 0.46                        | 5164              |

† Adjusted for age, sex, manual social class, lower education level, current cigarette smoker, body mass index > 30kg/m<sup>2</sup>.

Supplementary Figure | Flow diagram showing numbers of participants at various stages in the EPIC-Norfolk study including invitations, consents, attendance at health examinations and questionnaire completion.

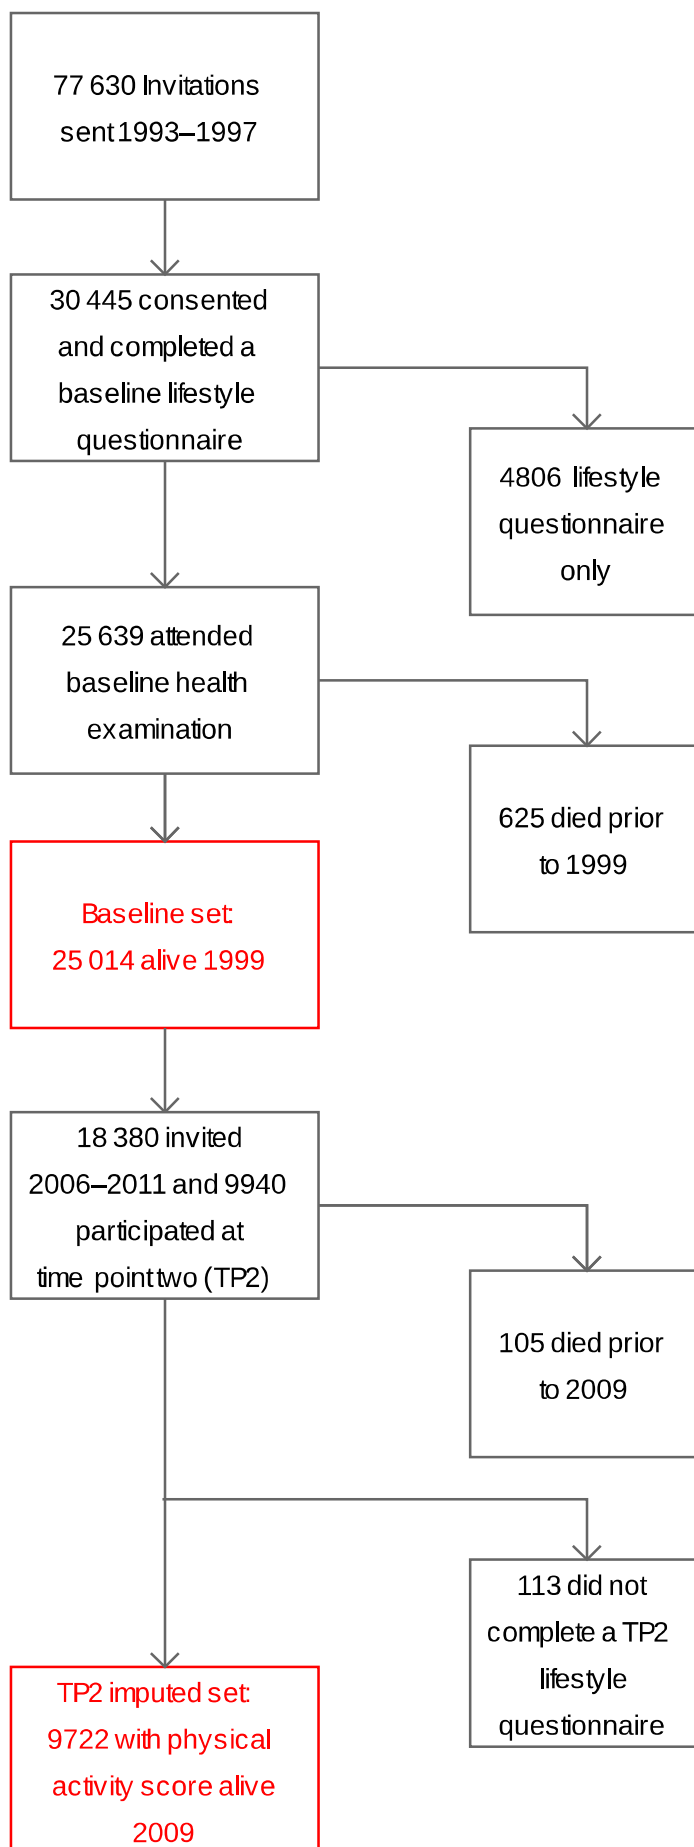

Supplement: 12877_2020_1573_MOESM1_ESM.pdf [file 12877_2020_1573_MOESM1_ESM.pdf]
